# Supplementary material for: Phylogenomic analysis reveals splicing as a mechanism of parallel evolution of non-canonical SVAs in hominine primates
Source: Mob DNA. 2018 Sep 17;9:30. doi: 10.1186/s13100-018-0135-2 (PMC6139936; doi:10.1186/s13100-018-0135-2)
Supplement: Supplementary file 6 — pt_SVA_D6 – a subfamily of non-canonical SVA elements in chimpanzees. Positions, target site duplications, length of the STK40-derived sequence and details on additional 5′ transductions are provided. (XLSX 21 kb) [file 13100_2018_135_MOESM6_ESM.xlsx]

## Sheet: Title
Additional file 6: pt_SVA_D6 - a subfamily of non-canonical SVA elements in chimpanzees.

## Sheet: pt_SVA_D6
A - Elements without additional 5' transductions
position panTro4	position panTro5	TSD	observations - assembly	length STK seq (bp)	5' transduction	source locus of 5' transduction (panTro4)	remarks
chr9:33,486,432-33,490,121	chr9:33,816,709-33,820,275	AAAAAAAA		192
chr1:140,983,868-140,986,127	chr1:140,837,248-140,841,376	AAGAGTAAGTTGCA	misassembly in panTro5	191
chr5:149510925-149511395	chr5:148,871,758-148,874,040	AAGAAAATGTGGCACATAT	5'gap in panTro4	191
chr5:177,480,888-177,485,972	???	AAGAAAGTA		190			short duplication at 5'
chr20:240,831-241,960	chr20:226,481-229,105	AAAAAAAAAAAAAAAAG		190
chr6:28,202,481-28,204,740	chr6:28,162,206-28,165,810	AAAAAGAAACCAAAGCA		188
chr9:11,342,105-11,345,223	chr9:11,396,656-11,398,541	AGAAATTCAGCTTT	misassembly in panTro4	187
chr3:112,972,989-112,975,248	chr3:112,716,350-112,719,703	AAGAATTATCA		187
chr4:185,374,160-185,374,753	chr4:186,367,046-186,371,919	GATAAAAATTCTTCTTTCT AATAAAAATTCTTCTTTCT		186
chr6:158,491,883-158,495,697	chr6:160,966,451-160,970,076	TAAAAAGTTAACTGTA		184
chr8:95,791,578-95,794,967	chr8:99,265,561-99,268,729	AAAAAGTAAAAAGAA		183
chrX_AACZ03178409_random:67-548	???		3' clone end	183
chrX:134122928-134123421	chrX:133,301,491-133,304,404	AAAAGAAAAGAAAAAA	5'gap in panTro4	183
chr2B:194,304,911-194,307,170	chr2B:80,202,716-80,205,263	AAAGAAAATGTGGC		181
chr4:114,834,235-114,837,624	chr4:115,238,745-115,242,204	AAGAAATGAAAATGA		180
chr5:108,920,942-108,923,201		AAAGAAAAAAACCC AAAGAAAAAAATCC		178
chr16:61,161,586-61,163,265	chr16:52,729,995-52,734,167	AAAAAAGATTACTGTTGCA		177
chr16:61,163,739-61,163,912	misassembly		3'gap	177
chr4:191247877-191248370	chr4:192,279,490-192,280,767	AAAGAAACAGCACTTGA	5'gap in panTro4	177
chr1:11,222,595-11,226,409	??? - misassembly?	AAGAATGTATGTGC		173
chrUn_GL395484:1-3,390	???	?		172
chr16:84,283,740-84,287,309	chr16:75,857,764-75,859,669	AAAAGAAAGCTCCGG	misassembly in panTro4	166
chr16:27,391,647-27,395,035	chr16:26,707,285-26,713,397	AAAAAGTACAAAA		164
chr1:39,259,722-39,263,006	chr1:38,415,267-38,416,264	AAGATAAAGGTGAATC		161
chrX:55,336,095-55,337,900	???		3'gap	159
chr2B:243,680,186-243,682,445	???	AAAAATTTTAAAGATA		153
chr9:99,362,731-99,366,545	chr9:78,289,417-78,293,236	ATATA		145
chrX:108,470,446-108,473,835	chrX:107,634,896-107,638,285	AAAGAAAATGTGG		144
chr17:75,912,894-75,916,283	???		3'gap	140
chr1:82,973,287-82,975,526	chr1:82,446,996-82,449,099	AAGAAACTGAAAATTG		137
chr1:59,289,444-59,291,704	chr1:58,538,064-58,541,185	AGAAACTCCCATCCT		137
chr16:29,901,562-29,903,822	chr16:28,739,853-28,742,473	AAAAATACAAAAATTA		132
chr1:28,203,082-28,205,341	chr1:27,324,510-27,327,323	AGAAATGTGAAAACTG	misassembly in panTro5?	132
chr12:129,306,199-129,307,705	???	AAGAAATACCCGAG		132
chr4:74,447,283-74,449,482	chr4:75,054,472-75,056,539	AAAAATACTGTAAACTGGG		121
chr12:39,875,921-39,879,385	???	AAAAATTAGCC		90
chr8:79,370,215-79,373,094	???	AAGATATGA		77
B - AluSp transduction group
chr6:42,193,079-42,196,348	chr6:42,085,001-42,088,306	AAAAAAAAAAAAAAGAAAGAA		122			SE for AluSp TD group
chr4:115,653,507-115,656,776	absent	AAGAGAATGTC		122	Alu_Sp in sense	chr6:42,196,251-42,196,540	SE: chr6:42,193,079-42,196,348
chrX:103,941,169-103,945,938	chrX:103,027,479-103,032,248	AAAAACTGTTAC		122	Alu_Sp in sense	chr6:42,196,251-42,196,395	SE: chr6:42,193,079-42,196,348
chr7:160,053,135-160,056,404	chr7:164,200,359-164,203,628	AAGAATCTCACTCAA	SEGDUP	122	Alu_Sp in sense	chr6:42,196,251-42,196,364	SE: chr6:42,193,079-42,196,348
chr7:160,715,858-160,719,127	chr7:164,963,062-164,966,331	AAGAATCTCACTCAA	SEGDUP	122	Alu_Sp in sense	chr6:42,196,251-42,196,364	SE: chr6:42,193,079-42,196,348
chrUn_GL396112:2,559-3,285	chr21_NW_015974359v1_random:208,014-211,697	AAGAATCTCACTCAA	SEGDUP	122	Alu_Sp in sense	chr6:42,196,251-42,196,364	SE: chr6:42,193,079-42,196,348
C - NORAD transduction group
chr14:44,633,569-44,636,838	absent	AAAAAATTA		122	NORAD spliced?	chr20:32,884,735-32,886,441	3' GGAAAAGAGGACATTC not traceable
chrX:141,256,579-141,258,758	???	AAAAAGTGGGAAGTAG	3'TD	122	NORAD spliced?	chr20:32,884,735-32,886,107	3' GGAAAAGAGGACATTC not traceable
chr3:185,659,563-185,662,832	chr3:185,598,654-185,601,885	AAGAGACAAATATTT		122	NORAD spliced?	chr20:32,884,735-32,885,993	3' GGAAAAGAGGACATTC not traceable
chr8:46,255,336-46,256,940	chr8:49,467,925-49,469,520	TAAAATGGTTAAAATGGTTAAT		122	NORAD spliced?	chr20:32,884,735-32,884,754	3' GGAAAAGAGGACATTC not traceable
chr11:121,730,492-121,733,761	chr11:124,258,364-124,263,830	AAAGAGTTACTATC		122	NORAD spliced?	not traceable
D - DENND5A transduction group
chr18:54,893,609-54,896,998	assembly uncertain	GAAAACTAGAATTTAG		185	DENND5A exon1	17bp untraceable chr11:9,080,221-9,080,245	SE for SVA on chr 16
chr16:31,937,469-31,942,553	chr16:30,666,635-30,674,111	AAAGACTTTATTA		185	DENND5A exon1 + 5' flanking from element on chr 18	chr18:54,893,967-54,894,180 17bp untraceable chr11:9,080,221-9,080,245
chr8:71,781,757-71,784,126	chr8:75,092,488-75,095,807	AAAAAAAAGTATTGCTCT		185	DENND5A exon1	10bp untraceable chr11:9,080,221-9,080,245
chr3:126,652,269-126,653,494	chr3:126,457,406-126,458,210	AAAATAGTATAAAGGA		185	DENND5A exon1+Aluseq+chr16	chr16:55,760,795-55,761,110 chr11:59,499,425-59,499,506 chr11:9,080,221-9,080,258
chr15:49,019,953-49,023,237	chr15:32,451,966-32,455,645	AAGAAAACCAACATC		185	DENND5A exon1+Aluseq	chr11:59,499,403-59,499,506 chr11:9,080,221-9,080,258
chr11:109,639,325-109,642,714	chr11:112,126,987-112,130,766	AAAAAAAT		185	DENND5A exon1 + L1seq	chr11:9,080,221-9,080,398	L1 not mappable
chr5:176,847,791-176,852,752	chr5:176,441,551-176,446,227	AAAAGAAAAGAAAAG		185	DENND5A exon1 + 15bp	15bp untraceable chr11:9,080,221-9,080,251
chr1:47,539,268-47,543,082	chr1:46,756,365-46,759,994	AAGAAGGCATGTTTT		185	DENND5A exon1	chr11:9,080,221-9,080,259
chr15:40,116,698-40,117,020	assembly uncertain		3'gap	185	DENND5A exon1	chr11:9,080,221-9,080,246
chr12:55,626,920-55,630,309	chr12:57,987,761-57,994,384	AAAAAAAAAAAAAAAAAAA		185	DENND5A exon1	chr11:9,080,221-9,080,242
chr6_GL390389_random:4,017,187-4,019,391	chr6:66,035,596-66,037,283	AAGACATCCA		185	DENND5A exon1	chr11:9,080,221-9,080,235
chr5_AACZ03157205_random:2,754-3,211	absent/liftover to chr 7 incorrect		3' clone end	185	DENND5A exon1	chr11:9,080,221-9,080,233
E - FLAM transduction group
chrUn_GL393536:156,017-158,559	chr9_NW_015973852v1_random:18,806-21,330	ATATAGTT		132	partial FLAM_C in antisense		not traceable
chr6:74,115,962-74,118,504	chr6:76,488,129-76,490,360	AAAATCCGATTGT		132	partial FLAM_C in antisense		not traceable
F - chr7_1 transduction group
chr12:18,231,628-18,234,237	chr12:18,570,261-18,573,249	AAAATTATTTC		161		chr7:46,751,444-46,751,645	3' GTTTAAGG not traceable
chr10:14,936,590-14,939,630	chr10:15,121,116-15,124,126	AAGAACAGCATGG	3'gap	161		chr7:46,751,482-46,751,645
G - chr7_2 transduction group
chr7:140,107,027-140,109,286	chr7:143,225,167-143,228,874	AAAAGTTTTGCT		173			SE
chr7:114,594,993-114,597,252	chr7:117,470,782-117,473,041	TAAAAGTGTGTAGC		173		chr7:140,107,108-140,107,177	SE: chr7:140,107,027-140,109,286
chrX_AACZ03178521_random:358-1,487	chr4:75,003,109-75,006,048	AGAAAGATCCATCTGT	3' clone end	173	contains 5' TSD of element on panTro5 chr7:143,225,167-143,228,874		SE: chr7:140,107,027-140,109,287
H - chr1_transduction group
???	chr1:132,352,794-132,355,686	GAGAAA		122			SE
chr4:119,887,825-119,891,094	chr4:120,314,445-120,317,714	AACATAAACAG		122	Aluseq	hg19:chr1:154,253,677-154,254,075 PanTro5:chr1:132,352,403-132,352,799	has SE on PanTro5 chr1:132,352,794-132,355,686
chr22:12,832,813-12,835,785	(chr22:24964617-24965019)	AAGAAATAGGAACAA	5'gap in panTro4	122	Alu Jr in sense; FLAM-C fragment	PanTro5:chr1:132,352,342-132,352,799	has SE on PanTro5 chr1:132,352,794-132,355,686
I - elements with exons in 5' transduction
chr9:6,171,732-6,173,990	chr9:6,168,503-6,173,862		3'gap	175	ERI1 spliced exon 1&2, 5' of intron2	chr8_GL390916_random:858,563-863,917
chr8:70,445,275-70,447,534	chr8:73,763,922-73,766,332	TAAATTTTTA		186	SNHG26 exon3 3'part	chr7:21,479,357-21,479,379
chr5:54,368,094-54,370,353	chr5:53,514,591-53,516,511	GAAAACTTATGTTC		190	ATP13A3 exon1,2 & intron2 spliced	hg19:chr3:194,195,926-194,207,455 PanTro5:chr3:198,831,266-198,842,803
chr1:12,555,100-12,560,436	chr1:11,900,675-11,905,822	AAAAAATTTCAAGTTC		129	LGR4 exon1	hg19:chr11:27,493,665-27,493,801 PanTro5:chr11:27,466,009-27,466,145
chr11:9,965,507-9,970,591	chr11:10,005,779-10,010,227	AAGATTGGAAATCC	misassembly in panTro4	168	partial Alu in sense non-repetitive RABGAP1L exon1 & intron seq	chr17:64,987,826-64,987,927 chr2B:172,587,918-172,587,946 chr1:152,648,240-152,659,628
chr10:61,339,067-61,342,531	chr10:63,841,751-63,843,629	TAATAATAATTATA	assembly panTro4	185	CGAG simple repeats WWC1 exon1 3'part	chr10:43,107,532-43,107,604 chr5:169,295,765-169,295,804
J - elements with other 5' transductions
chr6:32,544,702-32,549,731	chr6:32,484,524-32,490,382 ???	AAAACTAACAAAGGCT		190	partial Alu in sense	chr1:62,988,923-62,989,140
chr7:24,507,690-24,511,079	chr7:25,086,643-25,090,032	AGAAATAGAAAAAT		190	Hal	chr10:95,000,897-95,001,228
chr1:134,502,228-134,504,770	chr1:134,336,553-134,339,095	AAAAAACTATTAAGTC		184		chr11:72,750,791-72,750,893
chrX:123,480,427-123,482,612	chrX:122,590,809-122,603,996 ???	CAAAAATTTGTGAATTA		182	partial Alu		not mappable
chr12:96,905,958-96,908,207	chr12:99,438,815-99,441,129	AAAAAGGCACATAGTTG		182	16bp		too short to map
chr1:207,111,194-207,113,693	???	AAAAAGTATAGC		182	partial Alu in sense	chr7:43,354,707-43,354,946
chr10:21,614,440-21,616,982	chr10:22,078,651-22,082,458	GAAAAATGCATAATG		180	Alus in antisense	chr5:38,768,255-38,768,770
chr9:73512061-73512335	chr9:52,148,703-52,151,241		5'gap/misassembly in panTro4	179	47bp		not traceable
chr7:26,306,870-26,309,129	chr7:26,892,798-26,895,057	AAAACTTACAATCATCA		177	LINE&ERV	chr11:128,039,074-128,039,154
chr5:177,313,464-177,320,933	???	AACATATGCAAATC AACATACGCAAATC	misassembly in PanTro4	176	16bp		too short to map
chr5:48,937,300-48,940,689	???	TAAATGTCTCTGCTT		173	Alu in as, partial Alu in sense	chr22:16,071,288-16,071,847
chr7:78,070,277-78,073,651	chr7:80,341,792-80,344,277	AAAAAGTCAAGTCT		172	LINEseq		not mappable
chr11:46,698,176-46,700,435	???	AAAAACACAAAATT		171			too short to map
chr3:126,948,994-126,952,533	chr3:126,749,031-126,756,086 ???	AAAGAACAGAAACACA		156	partial MIR	chr8:36,377,775-36,377,857
chr1:192,698,570-192,704,292	chr1:192,541,647-192,545,668	AAAAGACAATAC		153	partial Alu in sense	chr14:30,839,389-30,839,496	3'TD
chr4:124,067,370-124,071,184	chr4:124,490,571-124,502,496	TAAATATATTAATCTC		137	LINEseq	chr19:50,666,135-50,666,158
chr3:34,384,933-34,387,192	chr3:34,552,196-34,556,176	AAAAACTGGATCC		132	partial LINE+non-rep	chr9:82,680,880-82,681,140
chr17:19,216,975-19,222,059	chr17:19,475,609-19,479,984	ATATGAATAGT		132	AluSz in sense	chr22:22,746,307-22,746,562
chr4:191,702,972-191,706,051	???	AAAAGATGGAGC		90	LTR & AluSz		not mappable
SE - source element; TD - transduction; TSD - target site duplication; as - antisense; SEGDUP - segmental duplication
